# Supplementary material
Source: HighWire-hosted journal article supplement (http://molpharm.aspetjournals.org/highwire/filestream/87396/field_highwire_adjunct_files/0/420_supp_data.pdf)
Supplement: 420_supp_data.pdf [file 420_supp_data.pdf]

## **Supplemental Data**

Effects of Sarcomere Activators and Inhibitors Targeting Myosin Cross-Bridges on  $\text{Ca}^{2+}$ -Activation of Mature and Immature Mouse Cardiac Myofilaments

Monika Halas\*, Paulina Langa\*, Chad M. Warren, Paul H. Goldspink, Beata M. Wolska, R. John Solaro

\* These authors contributed equally to the manuscript.

MOLPHARM-AR-2021-000420

Molecular Pharmacology

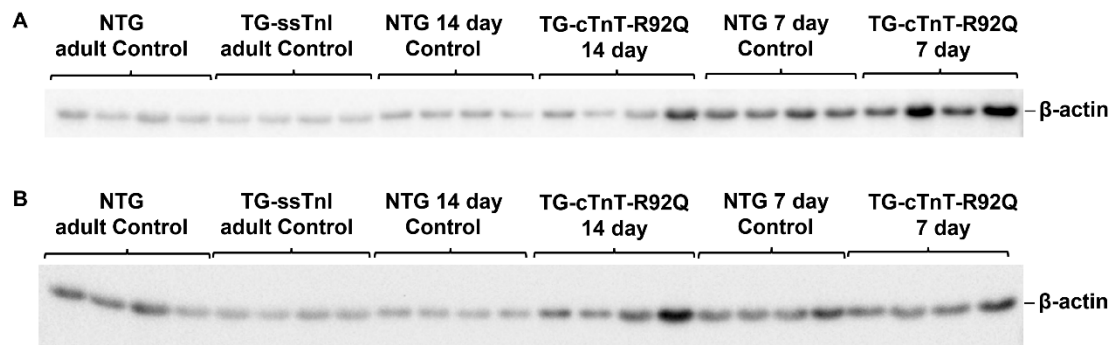

**Supplemental Figure S1. Western blot images probed with  $\beta$ -actin.** NTG, non-transgenic; TG-ssTnI, transgenic-slow skeletal troponin I; TG-cTnT-R92Q, transgenic cardiac troponin T with a single site mutation at position 92; day, age of animals in days; WT cTnT, wild type cardiac troponin T. **(A)** Loading control for Figure 1 panel A that was probed for troponin I isoforms. **(B)** Loading control for Figure 1 panel D that was probed for troponin T isoforms.

**Supplemental Table S1. Ca<sup>2+</sup>-activated percent control change of tension for TG and NTG mouse fibers treated with 0.3 μM OM or Mava.**

| Skinned Fibers         | Treatment   | % of Control Tension Change <sup>a</sup> |                           |                           |
|------------------------|-------------|------------------------------------------|---------------------------|---------------------------|
|                        |             | pCa 6.0                                  | pCa 5.85                  | pCa 5.75                  |
| NTG adult (n=5)*       | OM 0.3 μM   | 551.7±197.90                             | 250.0±91.07               | 152.40± 40.25             |
| TG-ssTnl adult (n=5)   | OM 0.3 μM   | 124.30 ±19.88 <sup>b</sup>               | 112.64±17.39 <sup>c</sup> | 104.05±12.94 <sup>d</sup> |
| NTG 7d (n=7)           | OM 0.3 μM   | 201.80±63.50                             | 128.18±26.99              | 111.30±18.92              |
| NTG 14d (n=6)          | OM 0.3 μM   | 389.06±186.74                            | 139.38±28.17              | 106.35±10.56              |
| NTG adult (n=5)**      | Mava 0.3 μM | 22.14 ± 16.05                            | 21.14 ± 10.44             | 19.12 ± 9.75              |
| TG-ssTnl adult (n=6)   | Mava 0.3 μM | 35.88 ± 32.30                            | 28.11 ± 13.03             | 32.97 ± 17.01             |
| NTG 7d (n=3)           | Mava 0.3 μM | 63.02±48.00                              | 49.49±14.63               | 40.47±14.01               |
| TG-cTnT-R92Q 7d (n=7)  | Mava 0.3 μM | 37.18±14.77                              | 42.21±14.82               | 47.33±14.50               |
| NTG 14d (n=4)          | Mava 0.3 μM | 33.44 ± 29.61                            | 9.22 ± 4.50               | 13.35 ± 5.42              |
| TG-cTnT-R92Q 14d (n=5) | Mava 0.3 μM | 18.66±13.61                              | 30.95±14.44 <sup>e</sup>  | 38.15±15.82 <sup>f</sup>  |

<sup>a</sup>Percent change in tension of treated fibers versus untreated controls. <sup>b</sup>P=0.0082, 95% CI of diff.

[-672.50 to -182.30] when compared to NTG adult, Welch's test; <sup>c</sup>P=0.0266, 95% CI of diff.

[-249.40 to -25.23] when compared to NTG adult, Welch's test; <sup>d</sup>P=0.0079, 95% CI of diff. [-91.98

to -4.77] when compared to NTG adult, Welch's test; <sup>e</sup>P=0.0251, 95% CI of diff. [4.08 to 39.38]

when compared to NTG adult Control Welch's test; <sup>f</sup>P=0.210, 95% CI of diff. [5.01 to 44.59] when

compared to NTG adult Control unpaired t-test, assuming equal SD. \*NTG adult controls (n=5)

data presented in Figure 2; \*\*NTG adult controls (n=5) data presented in Figure 5. Data are

presented as mean ± SD; Student's t-test. NTG, non-transgenic, TG-ssTnl, transgenic slow

skeletal Troponin I; TG-cTnT-R92Q, transgenic cardiac troponin T with a point mutation at R92Q;

OM, omecamtiv mecarbil; Mava, mavacamten.
